# Supplementary material for: Zr-Based MOFs as new photocatalysts for the rapid reduction of Cr(vi) in water
Source: Royal Society of Chemistry journal article supplement (doi:10.1039/d0nj00457j), 2020-01-01
Supplement: d0nj00457j1.pdf [file d0nj00457j1.pdf]

# Supporting Information

## **A new strategy for designing Zr-based metal organic frameworks to high efficient photocatalytic reduction of Cr(VI) under Visible light**

Haimei Xie<sup>†</sup>, Duomou Ma<sup>†</sup>, Wanyan Liu<sup>2,3†</sup>, Qian Chen<sup>1</sup>, Yong Zhang<sup>2,3</sup>, Jian Huang<sup>2,3</sup>, Hua  
Zhang<sup>2,3</sup>, Zhen Jin<sup>4</sup>, Tao Luo<sup>2,3\*</sup>, Fumin Peng<sup>1\*</sup>

1 College of Chemistry and Chemical Engineering, Anhui University, Hefei, Anhui 230039, PR  
China.

2 Anhui Key Laboratory of Water Pollution Control and Wastewater Resource, Anhui Jianzhu  
University, Hefei, Anhui 230601, PR China.

3 School of Environment and Energy Engineering, Anhui Jianzhu University, Hefei, Anhui 230601,  
PR China.

4 School of Materials and Chemical Engineering, Anhui Jianzhu University, Hefei, Anhui 230601,  
PR China.

<sup>†</sup> The authors contributed equally to this work.

\* To whom correspondence should be addressed: luotao\_edu@163.com (Tao Luo) &

pengfm79@gmail.com (Fumin Peng)

### **Synthesis of Zr-based MOFs with one hydroxyl group**

Zr-based MOFs with one hydroxyl group was solvothermally prepared by a reaction of  $\text{ZrCl}_4$  (0.125g) was dissolved in a mixed solvent of DMF/HCL (12mL, 10:2, v/v) and 2-Dihydroxyterephthalic acid (0.099g) was dissolved in 10 mL DMF. The two as-prepared solutions were mixed and stirred for 30 minutes. The mixture was carried out in an Teflon-lined stainless-steel autoclave sealed and heated to 80 °C for 12 hours. Yellow powders were obtained and washed with water and ethanol solvents several times. Finally, the as-synthesized sample was dried under oven at 60 °C for 12 hours for further use.

**Figure 1S** (a) XRD patterns of Uio-66-(OH). (b)SEM of image of Uio-66-(OH) with scale of 600nm. (c)SEM of image of Uio-66-(OH) with scale of 300nm. (d) FTIR spectra of Uio-66-(OH).

**Figure 2S** (a) Particle size distribution histogram of Uio-66-(OH)<sub>2</sub>. (b) Particle size distribution histogram of Uio-66-(OH).

**Figure 3S** (a) Thermogravimetric (TG) of Uio-66-(OH) under N<sub>2</sub> atmosphere. (b)N<sub>2</sub> adsorption-desorption isotherms of Uio-66-(OH).

**Figure 4S** The photocatalytic reduction of Cr(VI) effect of pollutant concentration on reduction of Uio-66-(OH) by using UV-vis.

**Figure 5S** Zeta potential of Uio-66-(OH)<sub>2</sub> as a function of pH value.

**Table S1** The parameters of the porous structure for different samples.

**Table S2** Elements, weight and Atomic in Uio-66-(OH)<sub>2</sub> after Photocatalytic experiments.

**Figure 1S**

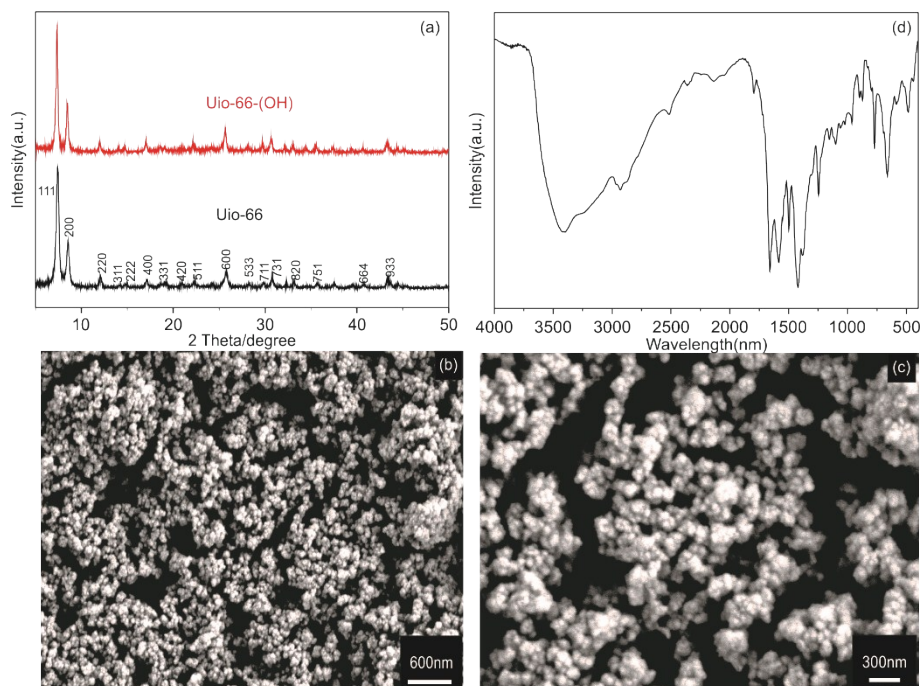

Figure 1S (a) XRD patterns of UiO-66-(OH). (b) SEM of image of UiO-66-(OH) with scale of 600nm.

(c)SEM of image of UiO-66-(OH) with size of 300nm. (d) FTIR spectra of UiO-66-(OH).

**Figure 2S**

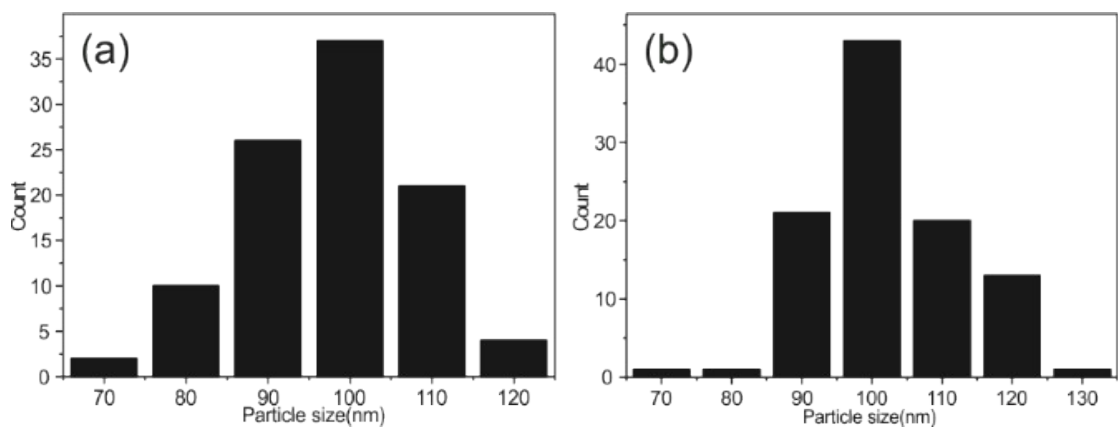

Figure 2S (a) Particle size distribution histogram of UiO-66-(OH)<sub>2</sub>. (b) Particle size distribution histogram of UiO-66-(OH).

**Figure 3S**

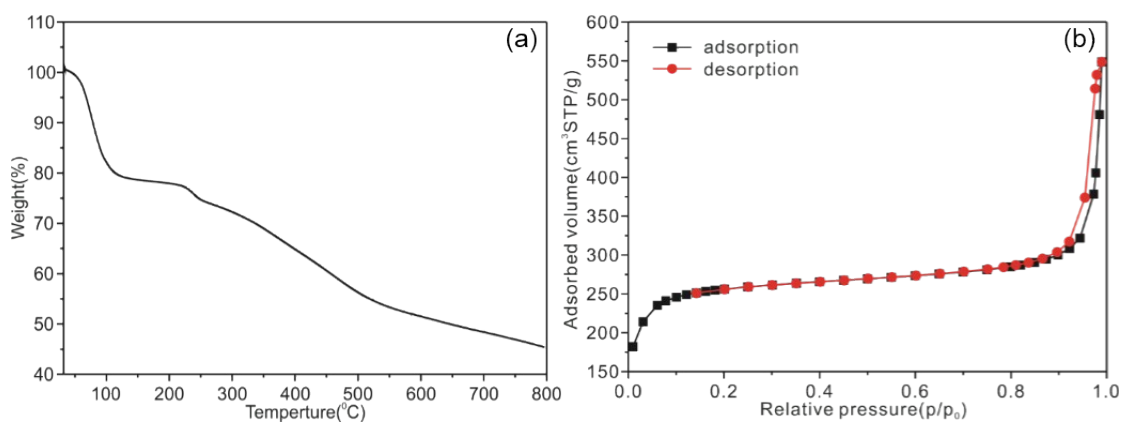

Figure 3S Thermogravimetric (TG) of Uio-66-(OH) under N<sub>2</sub> atmosphere and N<sub>2</sub> adsorption-desorption

isotherms.

**Figure 4S**

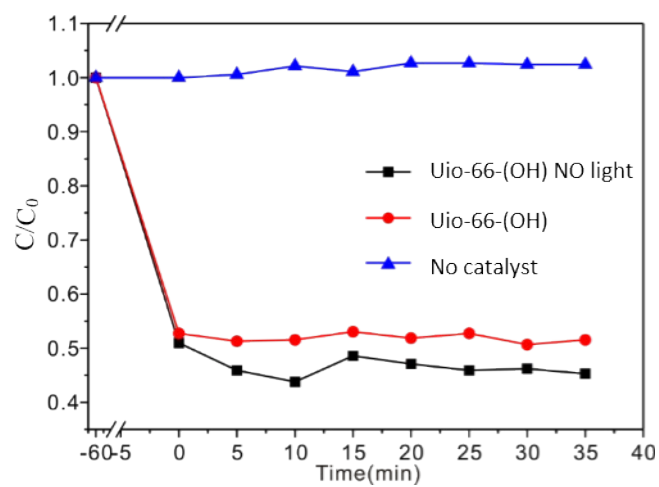

Figure 4S The photocatalytic reduction of Cr(VI) effect of pollutant concentration on reduction of materials by using UV-vis. (50 mg photocatalyst, 250 mL of 20ppm Cr(VI), reaction temperature is 25 °C, visible light, pH= 6.0)

**Figure 5S**

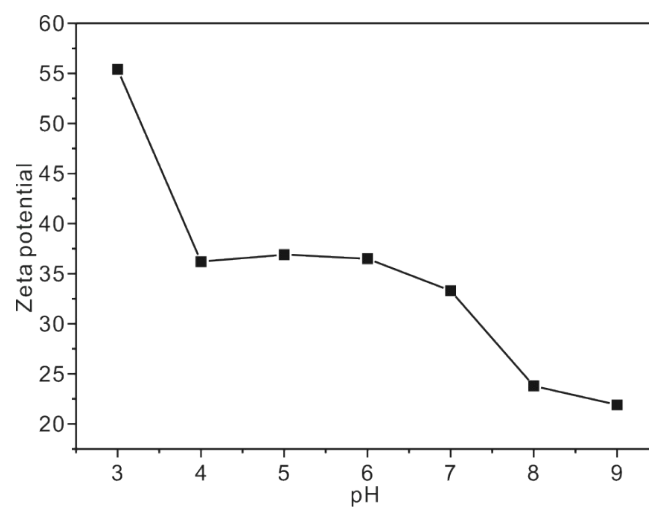

Figure 5S Zeta potential of UiO-66-(OH)<sub>2</sub> as a function of pH value.



**Table S1** The parameters of the porous structure for different samples.

| Material                                         | BET surface area (m <sup>2</sup> g <sup>-1</sup> ) | Pore volume (cm <sup>3</sup> g <sup>-1</sup> ) |
|--------------------------------------------------|----------------------------------------------------|------------------------------------------------|
| Uio-66-(OH) <sub>2</sub>                         | 561.51                                             | 0.54                                           |
| Uio-66-(OH)                                      | 788.24                                             | 0.85                                           |
| Uio-66-(OH) <sub>2</sub> after<br>photocatalytic | 292.01                                             | 0.58                                           |

**Table S2** Elements, weight and Atomic in Uio-66-(OH)<sub>2</sub> after Photocatalytic experiments.

| Element | Weight % | Atomic % |
|---------|----------|----------|
| C K     | 34.18    | 51.23    |
| O K     | 37.60    | 42.32    |
| Zr K    | 22.31    | 4.40     |
| Cr K    | 5.92     | 2.05     |
